# Supplementary material for: Estimation of genetic parameters and genotype-by-environment interactions related to acute ammonia stress in Pacific white shrimp (Litopenaeus vannamei) juveniles at two different salinity levels
Source: PLoS One. 2017 Mar 22;12(3):e0173835. doi: 10.1371/journal.pone.0173835 (PMC5362081; doi:10.1371/journal.pone.0173835)
Supplement: S3 Table — (XLSX) [file pone.0173835.s003.xlsx]

## Sheet: Sheet2
Family ID	1	2	3	4	5	6	7	8	9	10	11	12	13	14	15	16	17	18	19	20	21	22	23	24	25	26	27	28	29	30	31	32	33	34	35	36	37	38	39	40	41	42	43	44	45	46	47	48	49
30‰ salinity	16.3191	17.619	20.1316	20.9268	22	22.6047	23.0238	23.359	23.4615	24.1026	24.8286	24.9512	25.2	25.2381	25.5366	25.7105	25.7292	26.0294	26.8372	26.85	27.3333	27.8	28.175	28.1765	29.1951	29.641	29.7895	30.3684	31.7556	31.7674	31.9	32.0588	32.2857	32.5952	32.7647	33.087	33.4146	33.9318	34.0256	34.225	34.5714	34.6667	35	35.6579	36.6479	36.8158	37.1667	37.6667	37.8462
5‰ salinity	18.9231	10.6585	14.8421	12.9062	13.1111	14.8611	19.4103	20.9	26.2162	15.8636	31.8718	21.0286	13.3095	25.5676	24.8636	15.0789	12.3333	29.775	26.5882	27.8421	27.3333	18.871	25.2941	11.5	25.4571	20.8293	34.2778	29.2	23	22.2093	25.4737	29.561	30.359	19.6013	23.3947	10.1905	37.5	20.5909	34.9535	28.9231	27.2895	23.9737	27.5429	17.575	20.7429	11.3333	33.9189	22.7317	24.617
[truncated: 42 more columns]
